# Supplementary material
Source: PubMed Central journal article supplement (PMC2265075)
Supplement: NIHMS40472-supplement-01.pdf [file NIHMS40472-supplement-01.pdf]

## Supplemental Figure 1

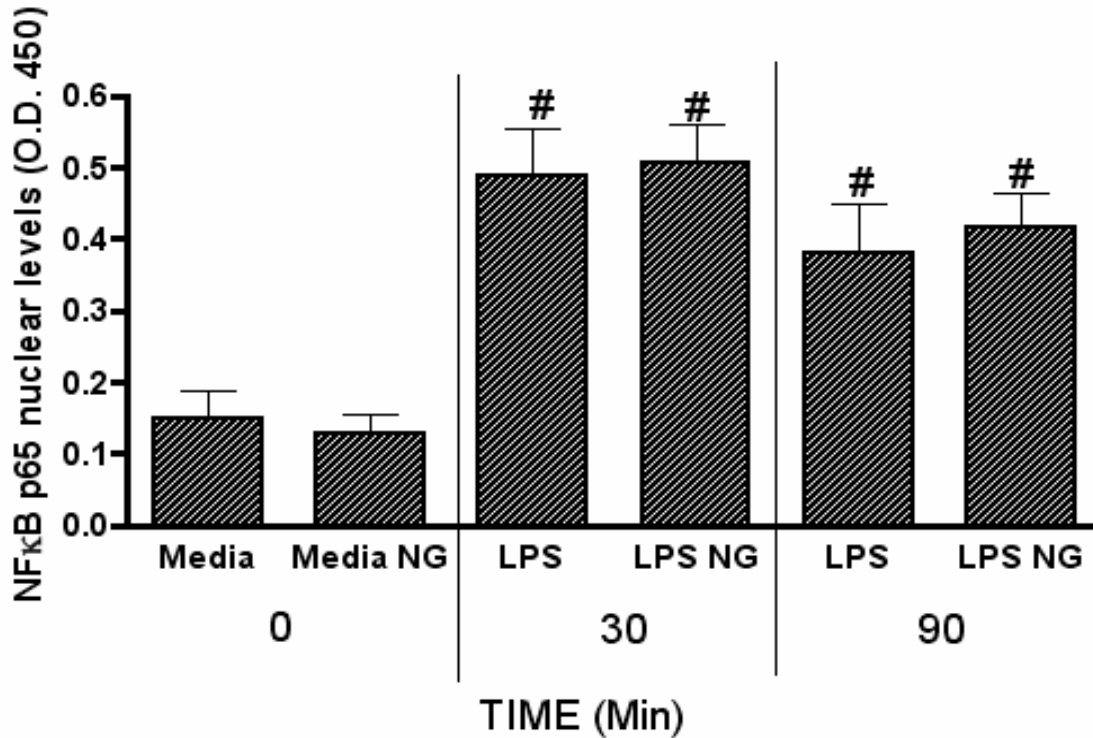

**NFκB p65 activity.** LPS-induced NFκB nuclear levels are unaffected by notoginseng. DC2.4 cells were stimulated with LPS and concurrently treated with 50 μg/ml notoginseng (NG). Cells were harvested after 0, 30 and 90 mins relative to LPS stimulation. Samples were lysed and the nuclear fraction was assessed for relative binding activity of NFκB p65 using the Active Motif TransAm ELISA kit. # Indicates significant differences between LPS-stimulated and unstimulated cells ( $p < 0.05$ ). Data are representative of 2 independent experiments consisting of 3 samples per treatment group.

## Supplemental Table 1

Notoginseng does not affect DC2.4 cell viability.

|               | <b>Notoginseng (µg/ml)</b> |            |            |            |
|---------------|----------------------------|------------|------------|------------|
|               | <b>0</b>                   | <b>5</b>   | <b>25</b>  | <b>50</b>  |
| <b>No LPS</b> | 88.7 ± 3.5                 | ND         | ND         | 82.0 ± 3.1 |
| <b>LPS</b>    | 80.0 ± 2.4                 | 82.3 ± 1.8 | 81.7 ± 3.0 | 81.7 ± 5.2 |

DC2.4 cells were not stimulated or stimulated with LPS (1µg/ml) and concomitantly treated with notoginseng (0, 5, 25 or 50 µg/ml) for 24 hours. Viability was determined by trypan blue exclusion and confirmed by flow cytometry. Data shown are representative of three independent experiments. Error bars indicate mean ± SEM of three samples. ND = not determined.
